# Supplementary material
Source: PubMed Central journal article supplement (PMC7286793)
Supplement: NIHMS1580946-supplement-Supplementary_Material.pdf [file NIHMS1580946-supplement-Supplementary_Material.pdf]

# Supplementary Material

## I. HYPERPARAMETER TUNING EXPERIMENTS

Different loss functions and number of parameters were explored in training MimickNet. The number of parameters were varied by changing the number of filters used at each of the 5 depths in our model. At each depth, two convolutional layers are performed using the number of filters chosen for that depth. No LeakyReLU activations were used, only ReLU activations.

In gray-box training, all models training under SSIM loss achieved a mean SSIM of above 0.967. Training was stable and robust to variation in the number filters and loss chosen.

In black-box training, we observed convergence issues which are common to training GANs unless LeakyReLU activations were used. With the inclusion of LeakyReLU, we use the 52993 model in subsequent analysis.

TABLE I

FILTERS USED AT EACH OF THE 5 DEPTHS IN THE GENERATOR MODEL.

| Params | Filters        | Shape        |
|--------|----------------|--------------|
| 13377  | 8-8-8-8-8      | $3 \times 3$ |
| 29601  | 8-8-8-8-8      | $7 \times 3$ |
| 34849  | 8-8-16-16-16   | $3 \times 3$ |
| 52993  | 16-16-16-16-16 | $3 \times 3$ |
| 77185  | 8-8-16-16-16   | $7 \times 3$ |
| 117697 | 16-16-16-16-16 | $7 \times 3$ |
| 330401 | 16-16-32-64-64 | $3 \times 3$ |
| 733025 | 16-16-32-64-64 | $7 \times 3$ |

TABLE II

GRAY-BOX HYPERPARAMETER RESULTS. THE MEAN AND STANDARD DEVIATION ACROSS A VALIDATION SET IS SHOWN BELOW. BEST AVERAGE METRICS ARE EMPHASIZED IN BOLD.

| Loss | Params | MSE $10^{-3}$    | MAE $10^{-2}$    | PSNR            | SSIM               |
|------|--------|------------------|------------------|-----------------|--------------------|
| ssim | 13377  | 2.78±3.22        | 3.97±2.40        | 27.4±3.9        | 0.967±0.015        |
| mse  | 13377  | 2.40±2.65        | 3.76±2.00        | 27.7±3.4        | 0.947±0.022        |
| mae  | 13377  | 2.51±2.86        | 3.83±2.13        | 27.6±3.5        | 0.946±0.018        |
| ssim | 29601  | 2.63±3.10        | 3.91±2.40        | 27.9±4.0        | 0.967±0.015        |
| mse  | 29601  | 2.19±2.25        | 3.61±1.81        | 27.9±3.2        | 0.940±0.019        |
| mae  | 29601  | 3.46±3.20        | 4.58±2.16        | 25.7±3.0        | 0.895±0.028        |
| ssim | 34849  | 2.49±2.88        | 3.78±2.28        | 27.9±3.9        | 0.975±0.013        |
| mse  | 34849  | 2.27±2.41        | 3.67±1.92        | 27.9±3.3        | 0.950±0.019        |
| mae  | 34849  | 2.31±2.54        | 3.68±1.96        | 27.9±3.4        | 0.951±0.016        |
| ssim | 52993  | 2.28±2.77        | 3.65±2.24        | 28.5±4.2        | <b>0.979±0.013</b> |
| mse  | 52993  | 2.19±2.40        | 3.60±1.92        | 28.1±3.4        | 0.956±0.017        |
| mae  | 52993  | 2.11±2.35        | 3.52±1.89        | 28.3±3.4        | 0.959±0.015        |
| ssim | 77185  | 2.38±2.91        | 3.70±2.28        | 28.3±4.0        | 0.976±0.015        |
| mse  | 77185  | <b>2.02±2.09</b> | <b>3.46±1.70</b> | 28.3±3.2        | 0.946±0.022        |
| mae  | 77185  | 2.14±2.23        | 3.55±1.80        | 28.0±3.2        | 0.947±0.020        |
| ssim | 117697 | 2.22±2.65        | 3.59±2.11        | 28.4±3.9        | 0.977±0.014        |
| mse  | 117697 | 2.72±2.51        | 4.07±1.95        | 26.9±3.1        | 0.931±0.023        |
| mae  | 117697 | 2.93±2.93        | 4.18±2.11        | 26.7±3.3        | 0.927±0.022        |
| ssim | 330401 | 2.25±2.79        | 3.61±2.22        | <b>28.6±4.1</b> | 0.977±0.013        |
| mse  | 330401 | 2.15±2.20        | 3.58±1.83        | 28.1±3.4        | 0.958±0.016        |
| mae  | 330401 | 2.23±2.42        | 3.61±1.89        | 28.0±3.4        | 0.958±0.016        |
| ssim | 733025 | 2.63±3.06        | 3.93±2.33        | 27.7±4.0        | 0.967±0.015        |
| mse  | 733025 | 2.40±2.51        | 3.79±1.97        | 27.7±3.4        | 0.945±0.023        |
| mae  | 733025 | 2.80±2.83        | 4.09±2.04        | 26.9±3.2        | 0.927±0.022        |

## II. PUBLIC AND PRIVATE DATA SPLIT

To better facilitate reproducibility, we have released a public dataset available on tensorflow datasets which consists only of phantoms and ultrasound images of Dr. Mark Palmeri. We provide model metrics of MimickNet only trained on phantom data, and model metrics if private *in vivo* images are included.

TABLE III

MODELS TRAINED ON DIFFERENT SUBSETS OF DATA. MEAN AND STANDARD DEVIATION ACROSS A TEST SET ARE SHOWN BELOW.

| Subset           | SSIM         | PSNR         |
|------------------|--------------|--------------|
| Private Training |              |              |
| All              | 0.94 ± 0.014 | 31.95 ± 2.04 |
| Graybox All      | 0.96 ± 0.012 | 32.86 ± 1.82 |
| Phantom          | 0.95 ± 0.007 | 33.50 ± 1.43 |
| Mark             | 0.96 ± 0.005 | 33.12 ± 0.92 |
| Public Training  |              |              |
| Phantom          | 0.90 ± 0.015 | 31.40 ± 2.76 |
| Mark             | 0.91 ± 0.005 | 31.43 ± 0.69 |

## III. MEDIA

Other media is provided in a .zip file which include the following:

- Image Frame Granularity Metadata
- Image Frame Granularity Metrics
- GIF and Public Data
- Dockerized Code

## IV. SELECT METRICS

We provide SSIM, PSNR, MAE, and MSE metrics for images displayed in Fig. 5 from top to bottom. Frame level metrics granularity of all test images in the Image Frame Granularity Metrics .csv file.

TABLE IV

FIG. 5 MIMICKNET METRICS FROM TOP TO BOTTOM.

| MSE $10^{-3}$ | MAE $10^{-2}$ | PSNR  | SSIM | CS   | L    |
|---------------|---------------|-------|------|------|------|
| 6.10          | 6.84          | 22.15 | 0.74 | 0.93 | 0.79 |
| 4.16          | 4.72          | 23.81 | 0.83 | 0.93 | 0.89 |
| 3.84          | 4.53          | 24.16 | 0.86 | 0.93 | 0.92 |
| 8.51          | 8.91          | 20.70 | 0.92 | 0.96 | 0.96 |
| 2.45          | 4.32          | 26.11 | 0.95 | 0.95 | 0.99 |
